# Supplementary material for: Chemopreventive and hepatoprotective roles of adiponectin (SULF2 inhibitor) in hepatocelluar carcinoma
Source: publisher site journal article supplement (doi:10.1515/hsz-2015-0265), 2016-01-06
Supplement: Supplementary file 1 [file hsz-2015-0265_suppl.docx]

**Chemopreventive and hepatoprotective roles of adiponectin (SULF2 inhibitor) in hepatocelluar carcinoma**

Mohammed M. H. Al-Gayyar, Ahmed Abbas and Ahmed M Hamdan

**Supplementary data**

**Supplementary data 1** Primer sets used for the detection of human and rat genes expression.

| Name | Sequence | Amplicon size | Annealing temperature |
| --- | --- | --- | --- |
| Human GAPDH F369 | 5’-AGAAGGCTGGGGCTCATTTG-3’ | 258 bp | 58°C |
| Human GAPDH R626 | 5’-AGGGGCCATCCACAGTCTTC-3’ |  |  |
| Rat GAPDH 165F | 5`- CCATCAACGACCCCTTCATT-3` | 193 bp | 58°C |
| Rat GAPDH 358R | 5`- CACGACATACTCAGCACCAGC-3` |  |  |
| Human FGF-2 F2896 | 5’-AAAGCAGGAGGATCGCTTGA-3’ | 94 bp | 58°C |
| Human FGF-2 R2989 | 5’-CCACCATGCCTGGCTATTTT-3’ |  |  |
| Rat FGF-2 70F | 5`- ATTTCCAAAACCTGACCCGAT -3` | 98 bp | 60°C |
| Rat FGF-2 168R | 5`- AACTTTCTCCCTTCCTGCCTTT -3` |  |  |
| Human E-Cd F4252 | 5`- TTGGGATTACAGACATGAGCC -3` | 135 bp | 56°C |
| Human E-Cad R4346 | 5`-AGAGTTTGAGGTTACAGTGAGC -3` |  |  |
| Rat E-Cad F4252 | 5`- GCGTGCCCTTTGTATGTAGTTTG -3` | 94 bp | 60°C |
| Rat E-Cad R4346 | 5`- ACAGTTCCGATTGCTTGCCTT -3` |  |  |
| Human *nfκb* F982 | 5`-ACCCTGACCTTGCCTATTTG-3` | 144 bp | 56°C |
| Human *nfκb* R1104 | 5`-GAAAAGCTGTAAACATGAGCCG-3` |  |  |
| Rat *nfκb* F45 | 5`- GGAAGTGAGAGAGTGAGCGAGAG -3` | 78 bp | 60°C |
| Rat *nfκb* R123 | 5`- GGGTGGCGAAACCTCCTC -3` |  |  |

**
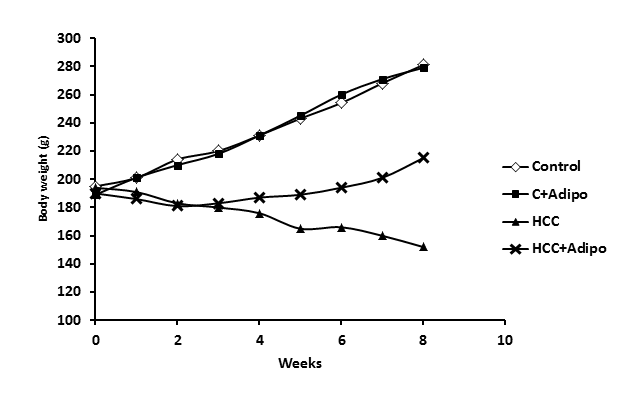
**

**Supplementary data 2** Body weight of different rats groups during the experiment.

**
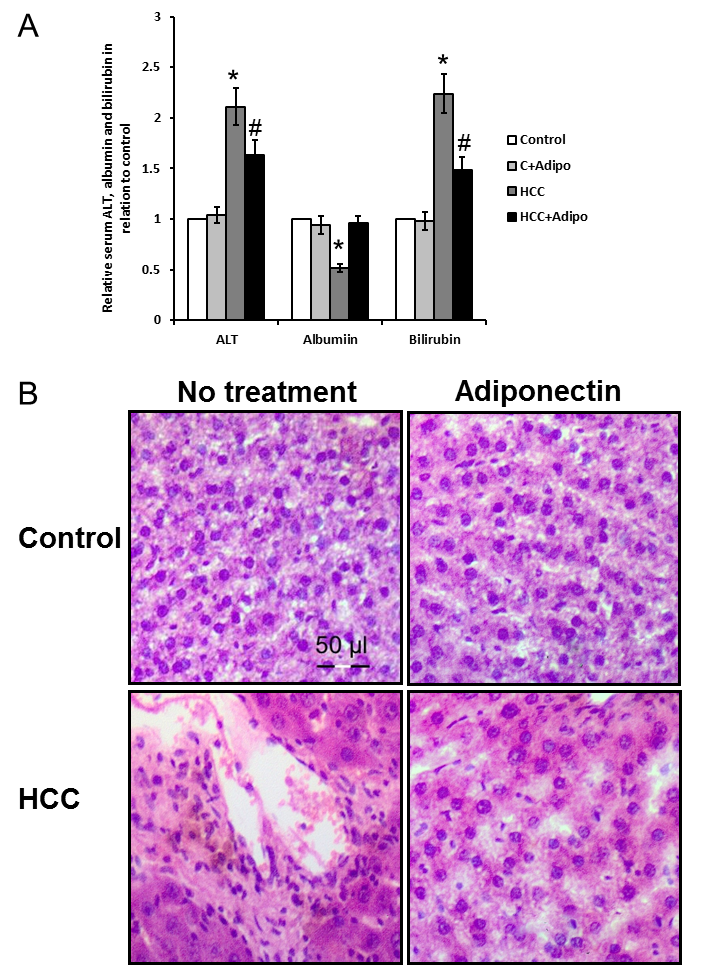
**

**Supplementary data 3** Hepatoprotective effects of adiponectin.

(A) Statistical analysis of liver function markers. (B) Histopathological examination of liver sections of different treated groups stained by H/E. *Significant difference as compared with the rest of the groups at *P*<0.05. #Significant difference as compared with the control groups at *P*<0.05.

**
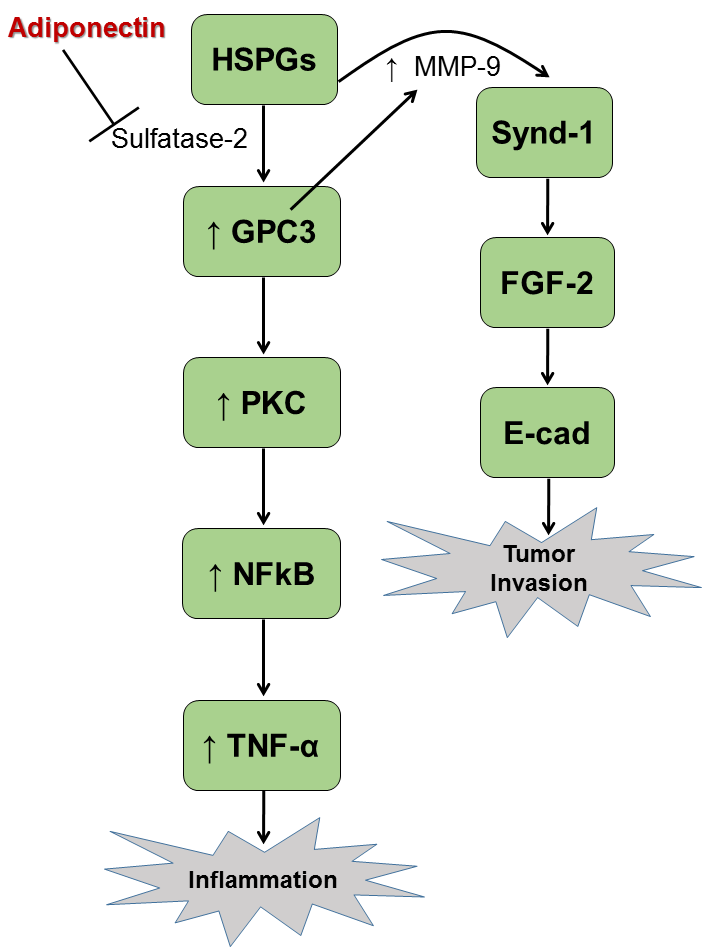
**

**Supplementary data 4** Schematic presentation of mechanism of action of adiponectin in Hepatocellular Carcinoma

Glypican-3 (GPC3) is highly expressed in HCC cells and tissues. GPC3 regulates migration, adhesion and actin cytoskeleton organization in mammary tumor cells through Wnt signaling modulation. Protein kinase C (PKC) can catalyze many biochemical reactions for cellular constituents. PKC helps malignant transformation by enhancing multiple cellular signaling pathways. PKC activates NF-B protein complex, which participates in many biological functions like cell survival, inflammation, angiogenesis, progression and metastasis. Activated NF-B protein complex is translocated from the cytoplasm to the nucleus, where it interacts with and expresses specific target genes. The abnormal activity of *nfκb* gene expression is noticed in some inflammatory mediators such as TNF-α, which is considered the initiating factors in hepatocarcinogenesis. TNF-α is the link between inflammation and cancer. TNF-α participated in the development of the tissue structure modification necessary for tumor growth and metastasis. We found significant elevation in the gene expression of *nfκb* and the protein expression of PKC and TNF-α in HCC *in vivo* and *in vitro* that was blocked by adiponectin.
